# Supplementary material for: A β-Catenin-TCF-Sensitive Locus Control Region Mediates GUCY2C Ligand Loss in Colorectal Cancer
Source: PubMed Central journal article supplement — Cell Mol Gastroenterol Hepatol. 2021 Dec 22;13(4):1276–96. doi: 10.1016/j.jcmgh.2021.12.014 (PMC9073733; doi:10.1016/j.jcmgh.2021.12.014), 2021-12-22

TGCACATACACACACCCAGCAGACACCCAGCAGACACACATCCCAGCAAACACACACACCTCGGTGTACACACACGCGCCTGTGTATATACACACTGACACACACACAC  
1890 1900 1910 1920 1930 1940 1950 1960 1970 1980 1990

KLF4 group  
CTCGATGTATATATGCACACCTCCTTGCACAGACACAGATACCTTGGTGTACACGGACACACATATACCCCTCAGCATAACACACATACACCTCAGCATATATACACATA  
:000 2010 2020 2030 2040 2050 2060 2070 2080 2090 2100

p53 related factors  
CACTCCTCAGTGTACACACATGCCTCAGCACACACACACCTTCAGCACAAGCACACATACAAACACACCTTGGCTACACACACCCATCAGGGTATATACAGACACCTTGGC  
10 2120 2130 2140 2150 2160 2170 2180 2190 2200 2210 NF-1A

MAD factors  
ATACACAGACATACACATCTCCGAGACACACCCCCCTTAACACACACACACACACACACACACACTCACCAGAAAGGGTGGGAAATCCAGTGCAGCTGTGAGGA  
2230 2240 2250 2260 2270 2280 2290 2300 2310 2320 Myogen... Myogen

KLF6  
KLF4 group  
CTGCCCTGGGAGCTGGGCCAGGAGCTACCTGCCCTCCCTGAGGGCCTTGTCCCTGCAGTTCCTCCTGGTCAGGCCCTGCTCTCTCCAATCCCTCTTCAGTGTGACTC  
2340 2350 2360 2370 2380 2390 2400 2410 2420 2430

GLI group  
MZF1  
TCCCCACCCAGGAATTCCTGCCCAACCTCCCGCCCTAGGGCTGTCTGGCATCGGGCCAGGTGGCTGAGTAGAAAGATGACAATCCCAGGGCTACCCTTTCTCCTGTGTC  
2450 2460 2470 2480 2490 2500 2510 2520 2530 2540 2550

BEN  
CTGGGGATTCTGCTCACAACAGCACACAGTGAATGCACGCTGCCCTGAGGGCGCAGTCTGAATGGGGTCAGAGTCTATAGGGGCGCGGGCACACCCAAGCAATCCCAG  
2560 2570 2580 2590 2600 2610 2620 2630 2640 2650 2660

TGAGATCCGCGGAAAGGG  
2670 2680 2690 2700 2710 2720 2730 2740 2750 2760 2770

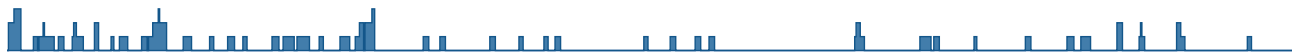

Supplement: mmc1.pdf [file mmc1.pdf]
